# Supplementary material for: Impacts of cationic lipid–DNA complexes on immune cells and hematopoietic cells in vivo
Source: Royal Society of Chemistry journal article supplement (doi:10.1039/d4bm00148f), 2024-01-01
Supplement: d4bm00148f1.pdf [file d4bm00148f1.pdf]

**Supporting Information for**

**Impacts of Cationic Lipid-DNA Complexes on Immune Cells**

**and Hematopoietic Cells *in Vivo***

Xiuxiu Cong<sup>a, b</sup>, Huizhu Tan<sup>a, b</sup>, Yue Lv<sup>a, b</sup>, Kuirong Mao<sup>a, b, c</sup>, Yanbao Xin<sup>a, b</sup>, Jialiang Wang<sup>e</sup>, Xiandi Meng<sup>a, b</sup>, Meng Guan<sup>a</sup>, Haorui Wang<sup>a, b, c</sup>, Yong-Guang Yang<sup>a, b, c</sup>, and  
Tianmeng Sun<sup>a, b, c, d \*</sup>

<sup>a</sup>Key Laboratory of Organ Regeneration and Transplantation of Ministry of Education, The First Hospital, Jilin University, Changchun, Jilin, 130061, China

<sup>b</sup>National-local Joint Engineering Laboratory of Animal Models for Human Diseases, Changchun, Jilin, 130062, China

<sup>c</sup>International Center of Future Science, Jilin University, Changchun, Jilin, 130015, China

<sup>d</sup>State Key Laboratory of Supramolecular Structure and Materials, Jilin University, Changchun, Jilin, 130012, China

<sup>e</sup>Department of Nuclear Medicine, Affiliated Hospital of Jiangnan University, Wuxi, Jiangsu, China

Correspondence: Tianmeng Sun

The First Hospital of Jilin University 71 Xinmin St Changchun, Jilin, China 130021

E-mail: tsun41@jlu.edu.cn (T. Sun)

Fax: +86-431-88783484

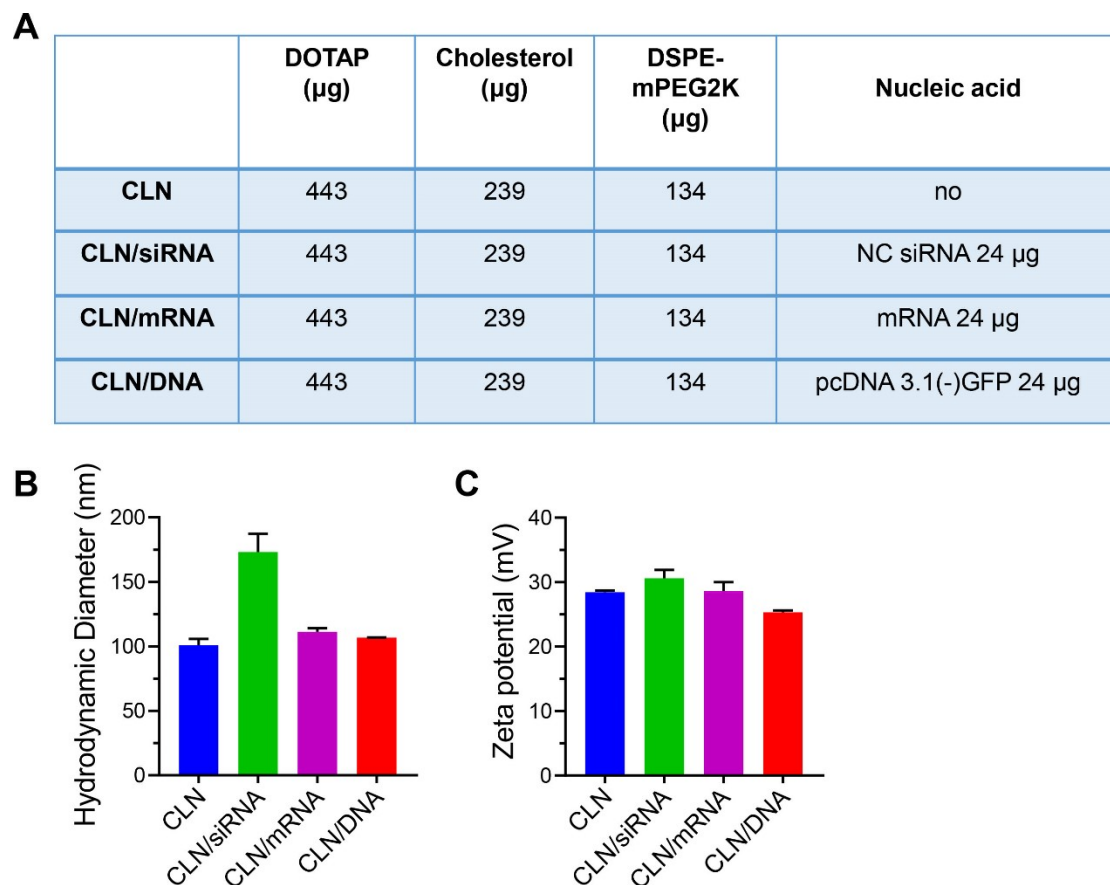

**Fig. S1. Characterization of cationic lipid nanoparticles.** (A) The composition of cationic lipid nanoparticles. The hydrodynamic diameter (B) and zeta potential (C) of CLN and CLN/DNA measured by dynamic light scattering ( $n = 2$  per group).

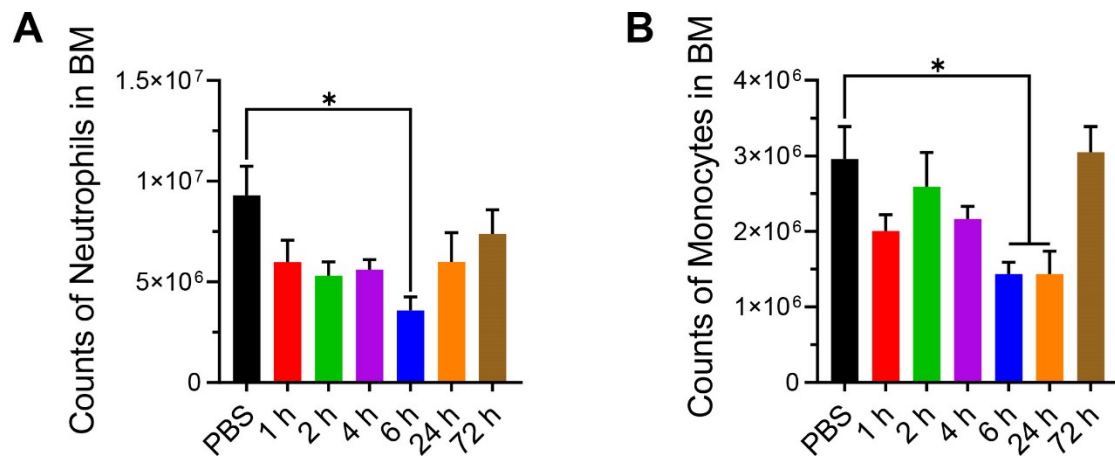

**Fig. S2. Dynamic interaction of CLN/DNA with neutrophils and monocytes over time.** C57BL/6 mice were treated with *i.v.* injection of PBS or CLN/DNA, the dose of nucleic acid was 1.1 mg/kg. After 1 h, 2 h, 4 h, 6 h, 24 h and 72 h of CLN/DNA treatment, the control group being assessed 72 h following the administration of PBS. BM cells were collected and analyzed by flow cytometry. The quantity of Neutrophils (A) and Monocytes (B) in BM at different time points after CLN/DNA treatment (n=3-5 per group). Data are presented as mean  $\pm$  S.E.M. \*,  $p < 0.05$ .

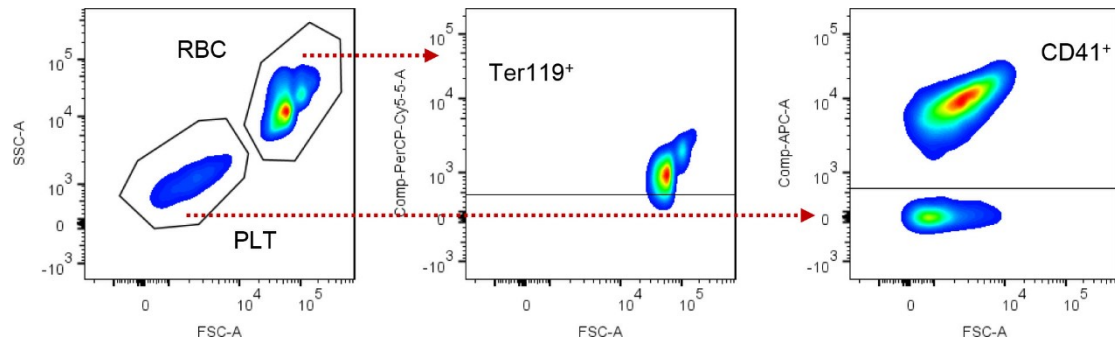

**Fig. S3. The gating strategy of flow cytometry.**

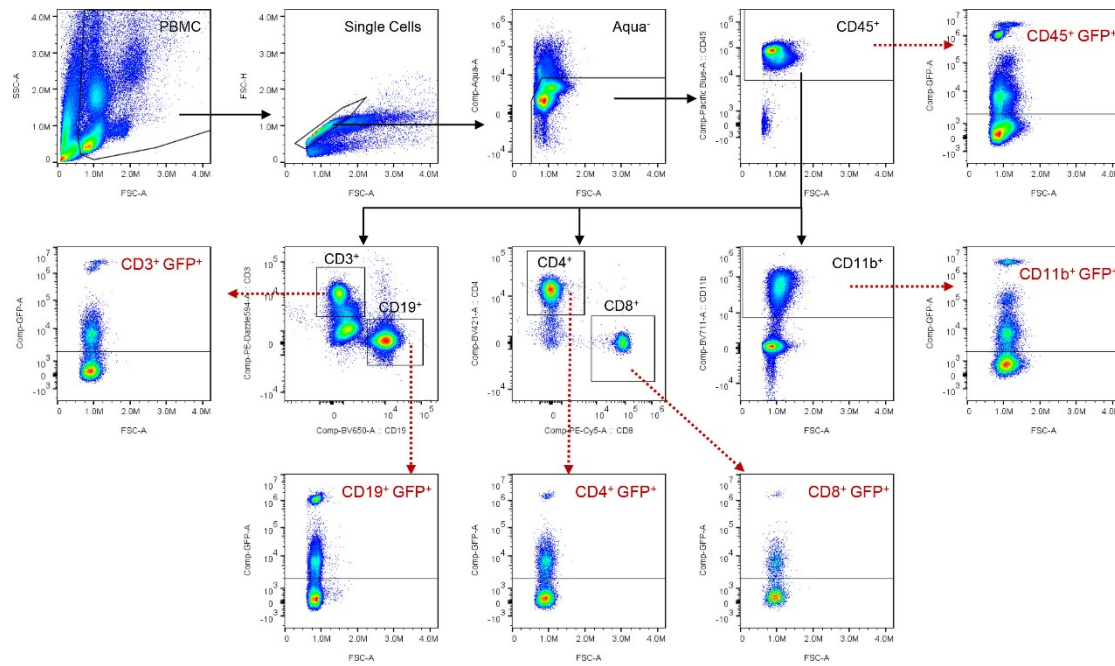

**Fig. S4. The gating strategy of flow cytometry.**

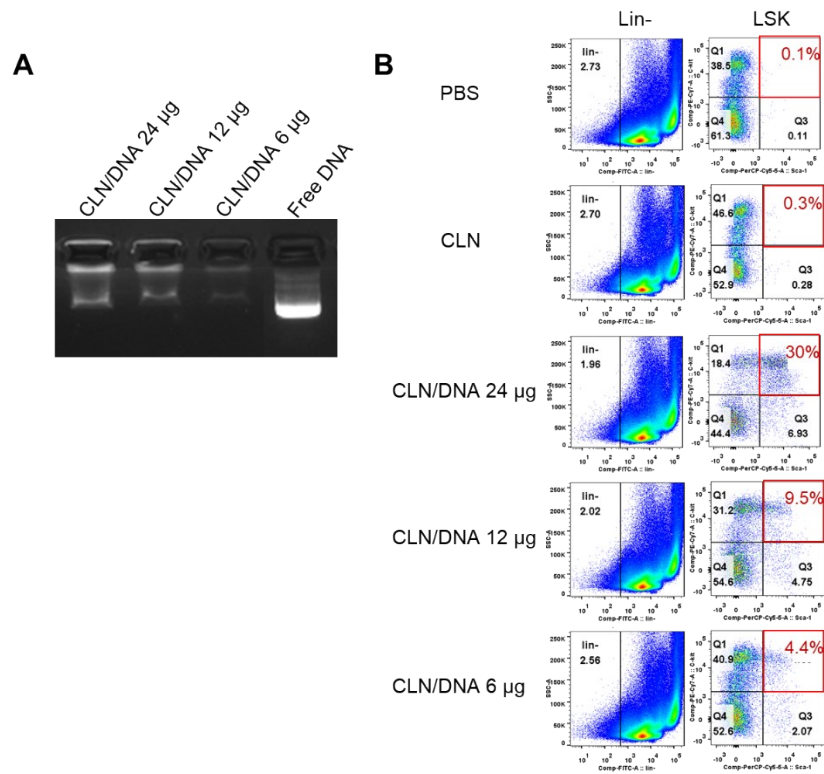

**Fig. S5. CLN/DNA induced HSC amplification was dose-dependent.** Preparation of lipids encapsulated with different doses of DNA (CLN/DNA-24  $\mu$ g, CLN/DNA-12  $\mu$ g and CLN/DNA-6  $\mu$ g). (A) The entrapment efficiency of CLN/DNA was detected by agarose gel assay. (B) C57BL/6 mice were treated with *i.v.* injection of PBS, CLN or CLN/DNA, after 24 h of nanoparticles treatment, BM cells were collected and analyzed by flow cytometry. The percentage of LSK in BM at 24 h after cationic lipid nanoparticles treatment.
